# Supplementary material for: Combined treatment with HMGN1 and anti-CD4 depleting antibody reverses T cell exhaustion and exerts robust anti-tumor effects in mice
Source: PubMed Central journal article supplement (PMC6352494; doi:10.1186/s40425-019-0503-6), 2019-01-29
Supplement: 40425_2019_503_MOESM1_ESM.pdf [file 40425_2019_503_MOESM1_ESM.pdf]

## **Supplementary materials**

### **Combined treatment with HMGN1 and anti-CD4 depleting antibody reverses T cell exhaustion and exerts robust anti-tumor effects in mice**

Chang-Yu Chen, Satoshi Ueha, Yoshiro Ishiwata, Shoji Yokochi, De Yang, Joost J. Oppenheim, Haru Ogiwara, Shigeyuki Shichino, Shungo Deshimaru, Francis H.W. Shand, Shiro Shibayama, Kouji Matsushima

7 figures, 3 methods, and 4 tables

## Supplementary figures

### Figure S1

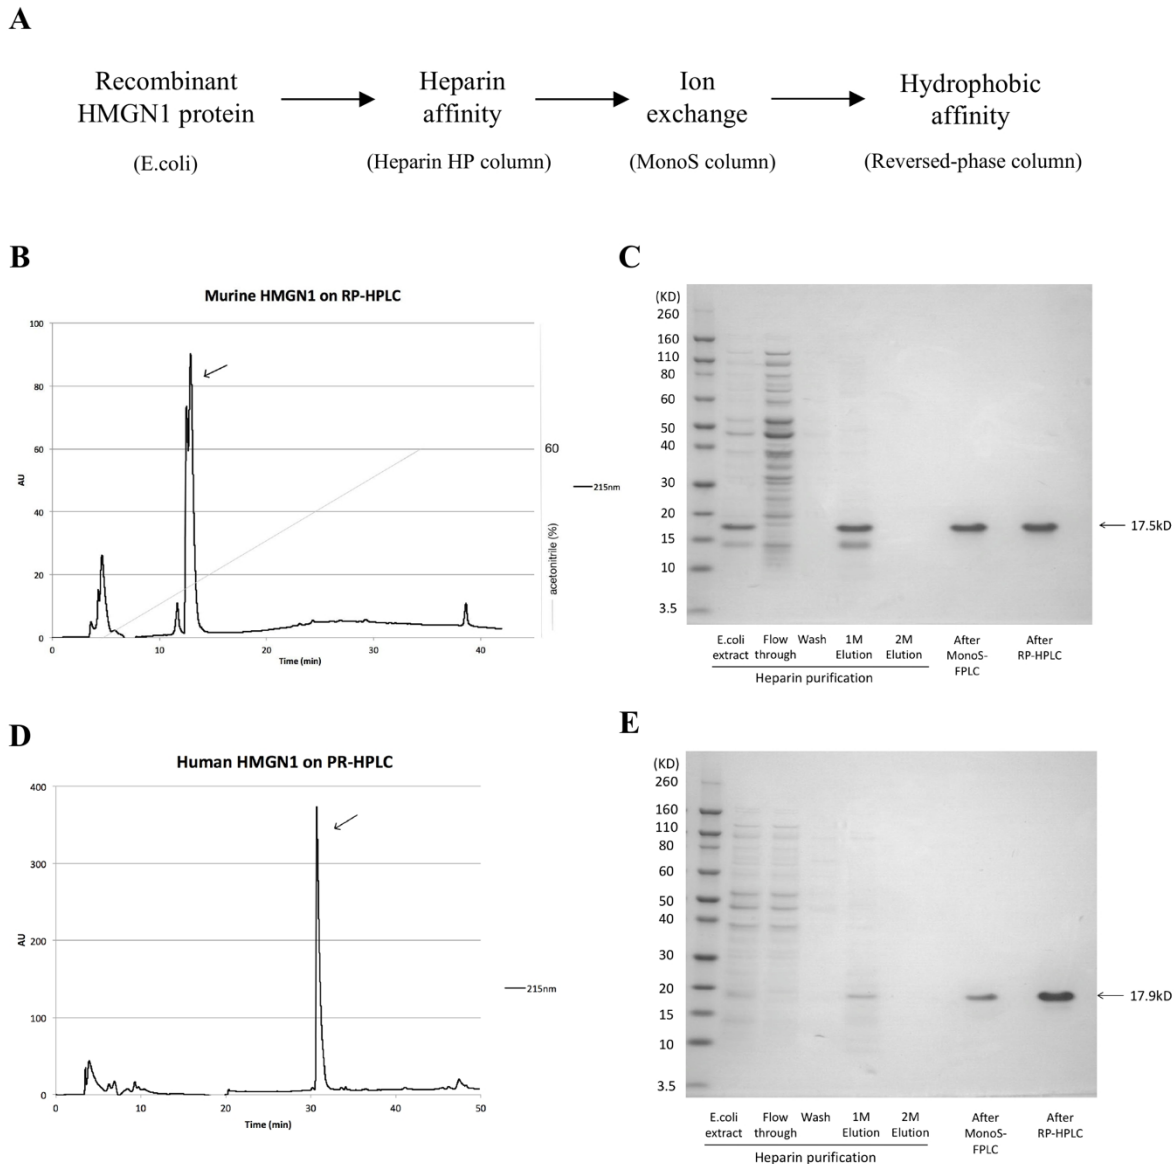

**Figure S1. The purification of recombinant HMGN1 proteins. (A)** The flowchart of purifying recombinant HMGN1 protein. **(B, D)** In reverse phase HPLC (RP-HPLC), the linear fractions with the highest absorbance unit (AU) were collected, and identified as murine HMGN1 (mH) or human HMGN1 (hH) by N-terminal amino acid sequencing. **(C, E)** MES buffered 4-12% Bis-Tris SDS-PAGE analysis of stepwise purification of mH and hH.

**Figure S2**

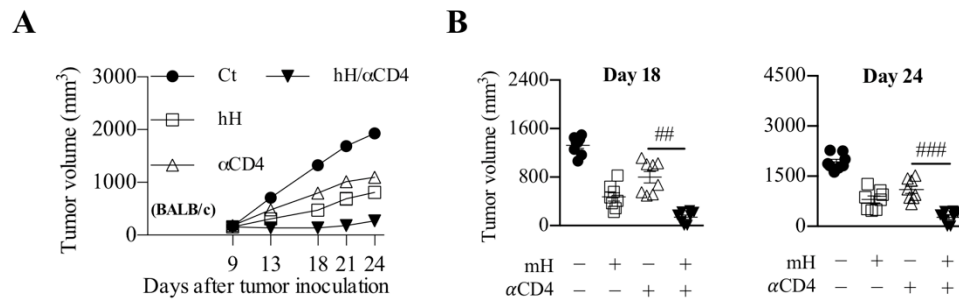

**Figure S2. Administration of human HMGN1 (hH) with anti-CD4 depleting antibody ( $\alpha$ CD4) exerted anti-tumor effects in mice.** The hH (at a dose of 0.16  $\mu$ g/ injection) was administered intraperitoneally on days 9, 14, 17, and 20 after tumor inoculation. The  $\alpha$ CD4 (at a dose of 200  $\mu$ g/ injection) was injected intraperitoneally on days 5 and 9 after tumor inoculation. **(A)** The quantitative analysis of tumor growth and tumor progression for each mouse until 24 days after treatment. **(B)** The tumor volume of each mouse on day 18 and day 24. Tumor growth is representative of three independent experiments with at least eight mice per group. Data are presented as mean  $\pm$  SEM. #,  $P < 0.05$ , ##,  $P < 0.01$ , ###,  $p < 0.001$  for a Student's *t*-test comparing mH/ $\alpha$ CD4-treated and  $\alpha$ CD4-treated groups.

**Figure S3**

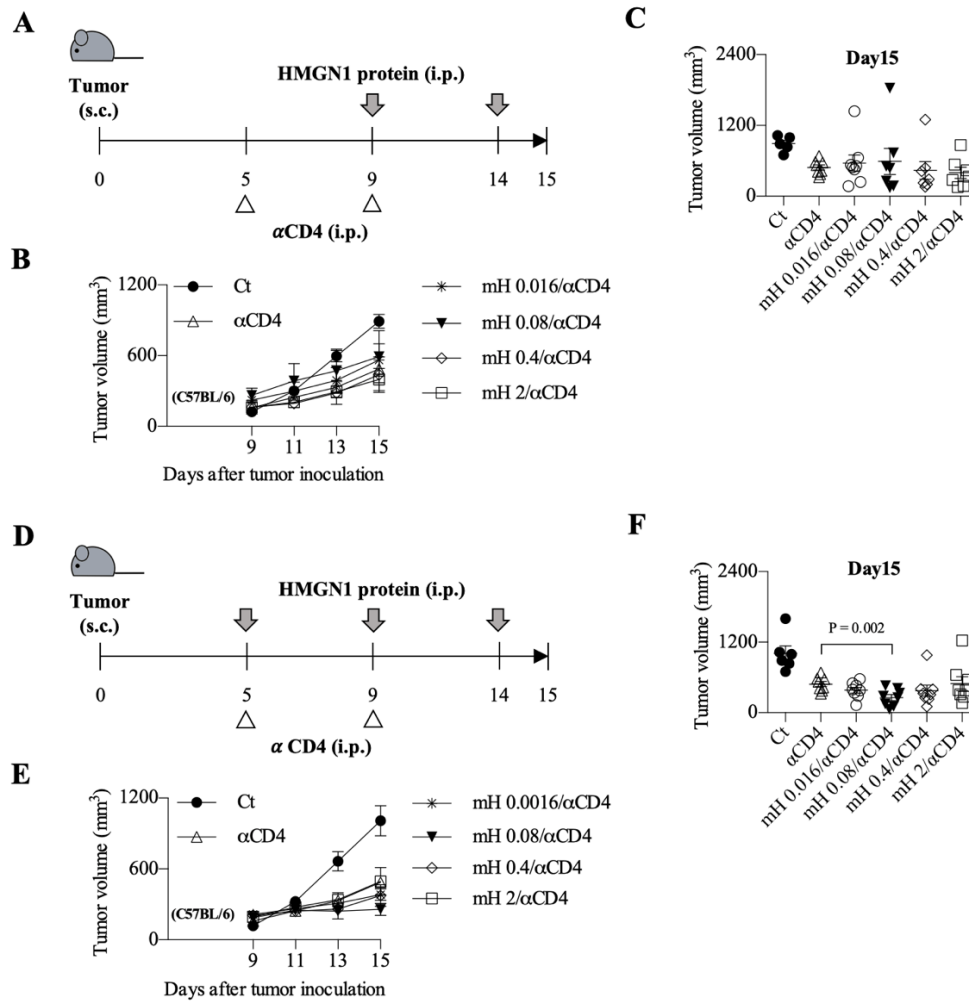

**Figure S3. Administration of murine HMGN1 with anti-CD4 antibody exerted anti-tumor effects in melanoma model. (A)** The administration of twice  $\alpha$ CD4 on day 5, 9 and twice mHMGN1 on day 9, 14. **(B, C)** The tumor growth rate and the tumor volume after mHMGN1/ $\alpha$ CD4 treatment. **(D)** The optimized administration of twice  $\alpha$ CD4 on days 5, 9 and three times mHMGN1 on days 5, 9, 14. **(E, F)** The tumor growth rate and the tumor volume after optimized mHMGN1/ $\alpha$ CD4 treatment. Tumor growth is representative of three independent experiments with at least eight mice per group. Data are presented as mean  $\pm$  SEM.

**Figure S4**

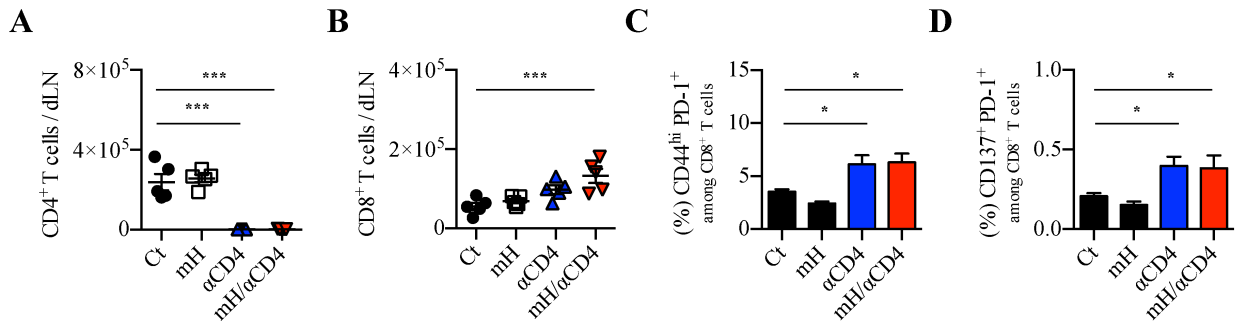

**Figure S4. Flow cytometry analysis of T cell populations in the draining lymph node (dLN) from Colon26 tumor-bearing mice on day 13 after tumor inoculation. (A)** The number of CD4<sup>+</sup> T cells. **(B)** The number of CD8<sup>+</sup> T cells. **(C, D)** The percentile of CD137<sup>+</sup> PD-1<sup>+</sup> and CD44<sup>hi</sup> PD-1<sup>+</sup> among CD8<sup>+</sup> T cells. Each result is representative of three independent experiments with at least four mice per group. Data are presented as mean ± SEM. \*, P<0.05, \*\*, P<0.01, \*\*\*, P<0.001 for a dunnett's *post hoc* test (compared with control).

**Figure S5**

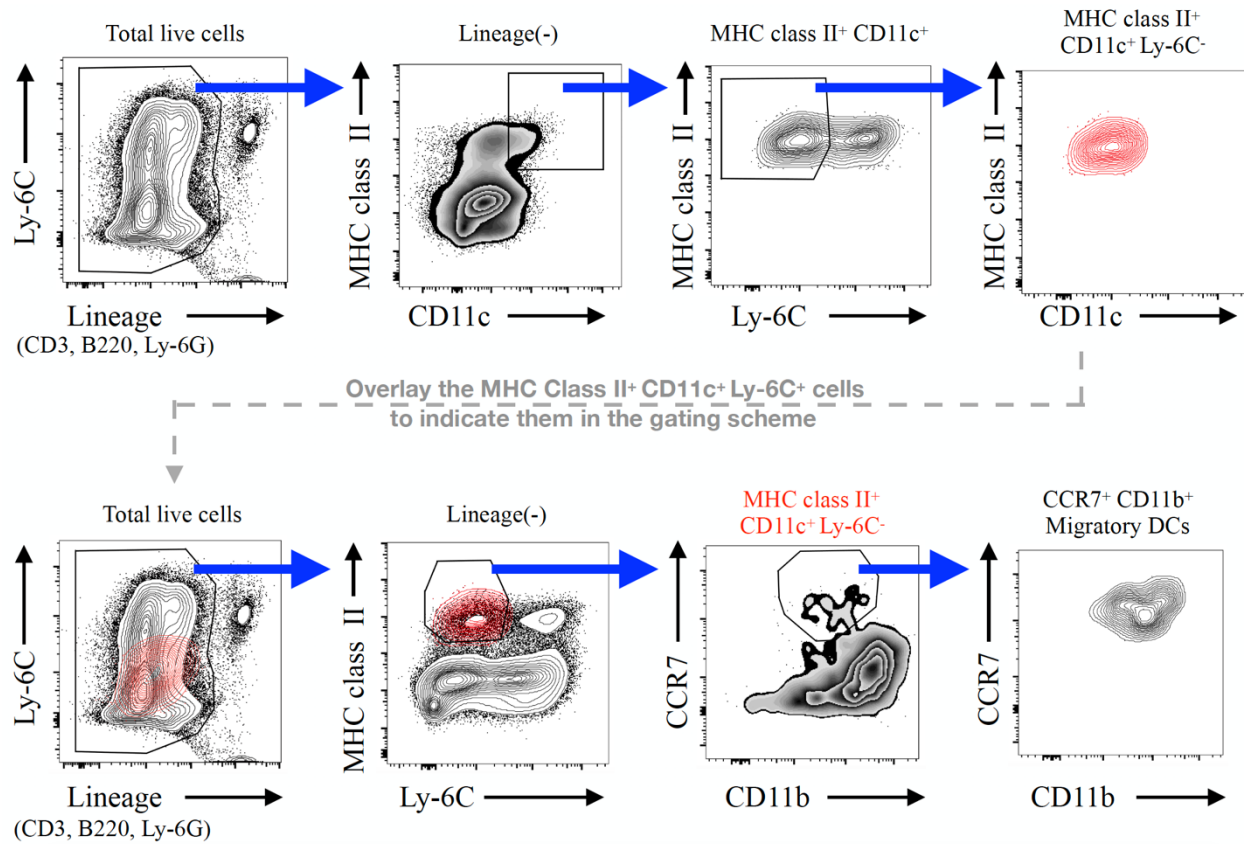

**Figure S5. Gating scheme of CCR7<sup>+</sup> CD11b<sup>+</sup> migratory dendritic cells (DCs).** Representative flow cytometry plots showing gating scheme for CCR7<sup>+</sup> CD11b<sup>+</sup> migratory DCs.

**Figure S6**

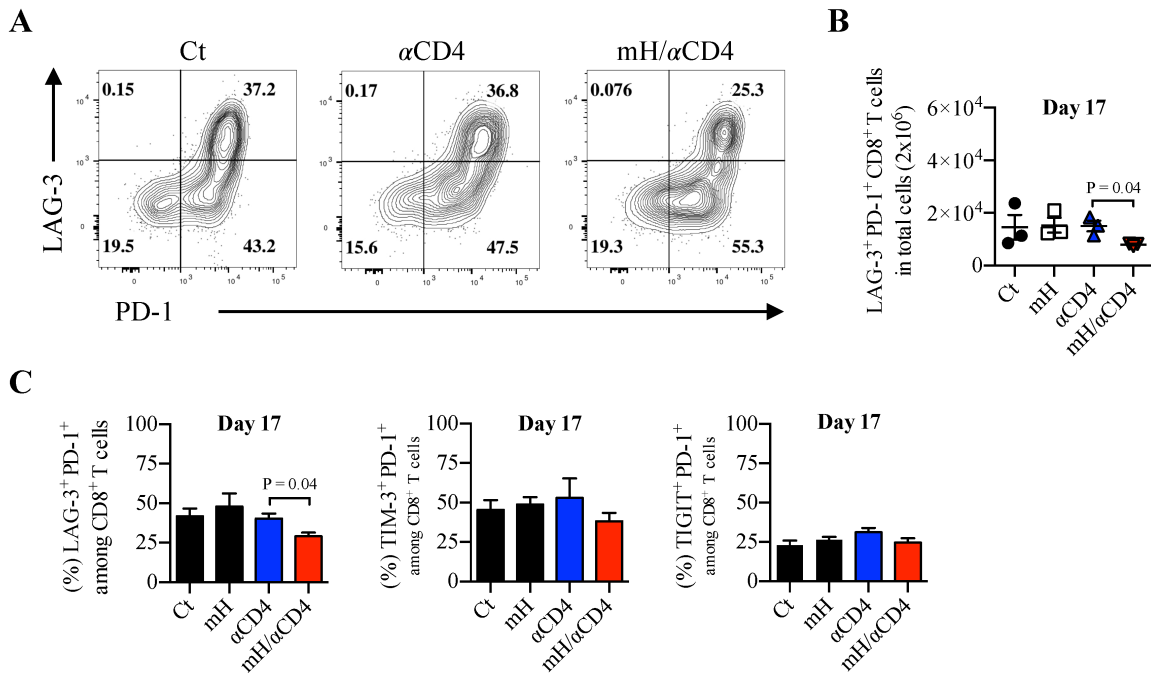

**Figure S6. Flow cytometry analysis of exhausted CD8<sup>+</sup> T cell populations in the tumor from tumor-bearing mice on day 17 after treatment. (A, B)** The compartment and the cell number of LAG-3<sup>+</sup> PD-1<sup>+</sup> CD8<sup>+</sup> T cells in the tumor. **(C)** The percentage of LAG<sup>+</sup> PD-1<sup>+</sup>, TIM-3<sup>+</sup> PD-1<sup>+</sup>, and TIGIT<sup>+</sup> PD-1<sup>+</sup> among CD8<sup>+</sup> T cells. Each result is representative of three independent experiments with at least four mice per group. Data are presented as mean  $\pm$  SEM. p values in the figure indicate the Student's *t*-test comparing mH/ $\alpha$ CD4-treated and  $\alpha$ CD4-treated groups.

Figure S7

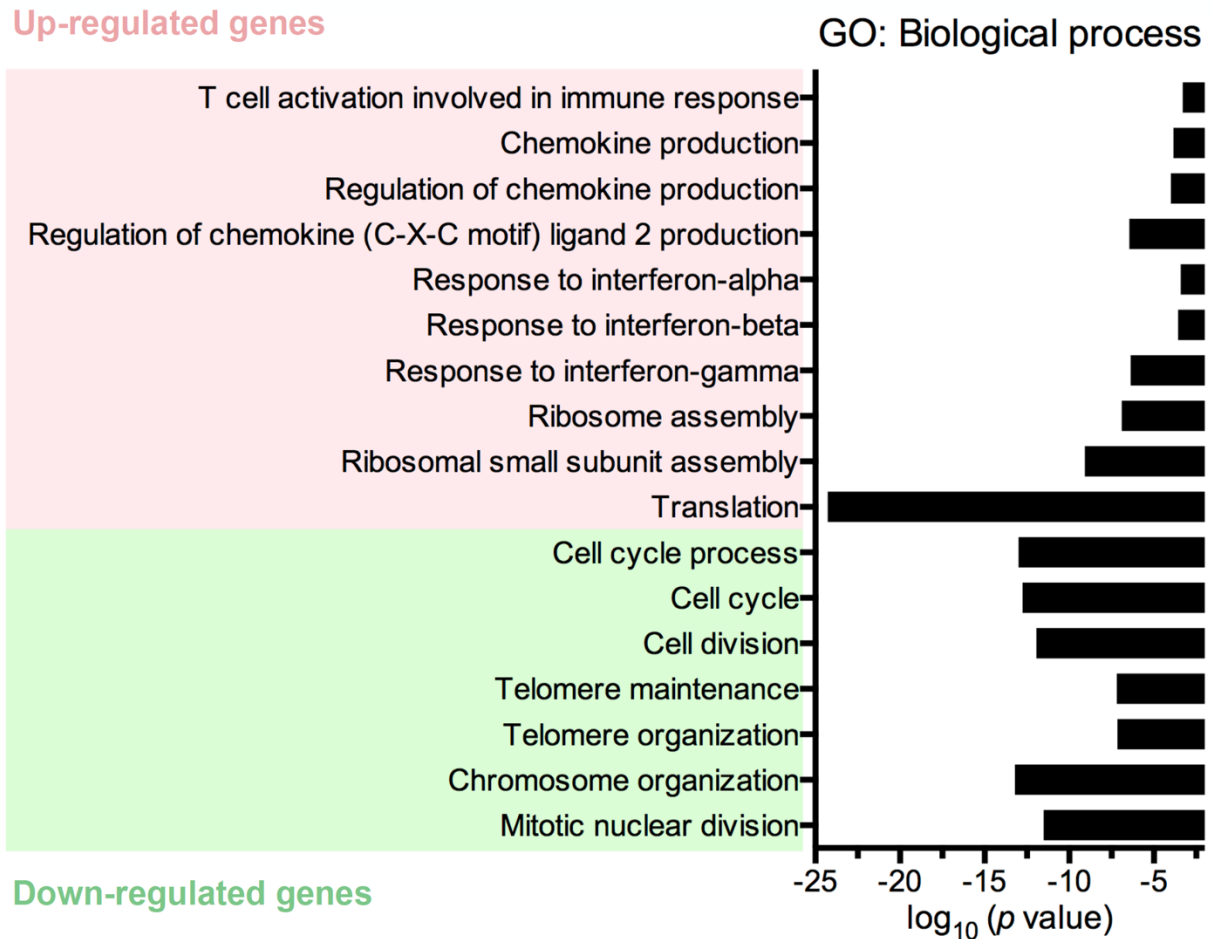

**Figure S7. CD8 T cell transcriptome analysis revealed the promotion of activation after HMGN1/ $\alpha$ CD4 treatment.** Biological events associated with 517 DEGs (157 up-regulated and 364 down-regulated) were explored and grouped using Cytoscape and ClueGO plugin. Significantly enriched Gene ontology (GO) leading terms are shown on the left side of the graph. The statistical significance of each enrichment ( $p$  value,  $\log_{10}$ ) was represented by bar graph.



## Supplementary methods

### Supplementary method 1. Production and purification of HMGN1 in E. coli

The expression pET-17b plasmid with murine HMGN1 coding region (122-412) or human HMGN1 coding region (205-507) was transformed into BL21 Star<sup>TM</sup> (DE3) E. coli (Thermo Fisher Scientific) by heat shock method. The single colony was picked up and pre-cultivated in a LB/ampicillin medium until the OD600 absorbance reaches 0.6. Added isopropyl  $\beta$ -D-1-thiogalactopyranoside (IPTG, final concentration equal to 1 mM) into culture medium and cultivated the cells for 4 hours. The cell pellet was collected by centrifugation at 15,000 x g for 5 min, and then the soluble proteins were extracted from cell pellet by sonication. To purify the recombinant HMGN1 protein from soluble proteins, the following procedures were administered to each subject in the order mentioned. (1) For heparin-affinity chromatography, the soluble proteins were applied to a HiTrap<sup>TM</sup> Heparin HP column (5 ml, GE Healthcare) equilibrated with 10 mM sodium phosphate buffer, pH 7.0 (NaPB) containing 0.2 M NaCl. After washing the column, HMGN1 was eluted by NaPB with 1 M NaCl. (2) For cation exchange chromatography, the eluted HMGN1 from heparin column was loaded into a Mono S HR 5/5 (5 x 50 mm, Pharmacia Biotech) equipped to a FPLC system (Pharmacia Biotech), equilibrated with NaPB buffer, and adjusted the flow rate to 1 ml/min. The HMGN1 fractions were eluted by a linear gradient from 0.2 to 1.0 M NaCl in NaPB. (3) For hydrophobic interaction chromatography, the HMGN1 fractions from MonoS-FPLC were directly referred to a reverse phase RP-304 column (4.6 x 205 mm, C4, BioRad) equipped to a HPLC system (Gilson). The HMGN1 was purified by a linear gradient of acetonitrile from 0 to 60% in water with 0.01% trifluoroacetic acid (TFA). The acetonitrile was further removed from the purified sample by freeze-drying. Highly purified recombinant HMGN1 was examined the endotoxin level and was kept frozen at -80°C.

## **Supplementary method 2. 3'end Serial Analysis of Gene Expression (SAGE) sequencing library preparation**

Three minutes before collecting tumor tissues, intravascular leukocytes were stained by intravenous injection of FITC anti-CD45 antibody. CD8<sup>+</sup> T cells from tumor tissue were labeled with APC anti-CD8 antibody (clone: 53-6.7; BioLegend, USA), anti-APC microbeads (Miltenyl Biotec, Germany), and lineage antibody cocktail (FITC anti-CD11b, FITC anti-B220, FITC anti-CD49b, FITC anti-Ter119, and Pacific blue anti-CD4 antibodies). Labeled CD8<sup>+</sup> T cells were separated by using an autoMACS cell separator (Miltenyl Biotec, Germany). Then, CD8<sup>+</sup> T cells were further purified from lineage sorting (CD45<sup>-</sup>CD11b<sup>-</sup>B220<sup>-</sup>CD49b<sup>-</sup>Ter119<sup>-</sup>CD4<sup>-</sup>CD8<sup>+</sup>) by FACS Aria II Cell Sorter (BD Biosciences, USA).

Purity of isolated CD8<sup>+</sup> T cells among live cells was over 99% for RNA transcriptome analysis. Total RNA was extracted from 10,000 CD8<sup>+</sup> T cells of each sample and stored in lysis/binding buffer (Thermo Fisher Scientific, USA). Messenger RNA (mRNA) was isolated from total RNA by Dynabeads M-270 streptavidin with biotin-oligo (dT)<sub>25</sub> (Thermo Fisher Scientific, USA). First- and second-strand cDNA synthesis was performed by Superscript reverse transcriptase IV (Thermo Fisher Scientific, USA) and Kapa HiFi DNA polymerase (Roche, Switzerland). While capturing on the beads, cDNA was digested with restriction endonuclease NlaIII (Thermo Fisher Scientific, USA), which cleaved the 3' end CATG/GTAC restriction site. Each cDNA fragment carrying the 3'CATG overhang was ligated to an adapter carrying common sequence 1 (CS1) and EcoP15I recognition site (5'-CAGCCAG-3'), and sequentially digested by EcoP15I restriction endonuclease to generate a 27-bp sequence with 5' end overhang (2-bp). Next, another adaptor carrying CS2 and sequencing primer site was ligated to the 5' end overhang of 27-bp sequence, and the 46-bp ligation product was obtained by MinElute PCR purification kit (Qiagen, Germany). Finally, an 8-cycle PCR step was performed to enrich for the desired cDNA library molecules, and those cDNA library products were purified by size selection using AMPure XP beads (Beckman Coulter, USA). We used Ion Torrent (Thermo Fisher Scientific, USA) to prepare cDNA template, the template which further analyzed by Ion Proton Sequencer (Thermo Fisher Scientific, USA).

## Supplementary tables

**Table S1 | The list of recombinant proteins and peptides**

| Species | Description        | Abbreviation | Amino acid sequence      |
|---------|--------------------|--------------|--------------------------|
| Murine  | HMGN1 (1-96 a.a.)  | mH           | 1- MPKRKVSADGAAKAEPKRRS  |
|         |                    |              | 21- ARLSAKPAPAKVDAKPKKAA |
|         |                    |              | 41- GKDKASDKKVQIKGKRGAKG |
|         |                    |              | 61- KQADVADQQTTELPAENGET |
|         |                    |              | 81- ENQSPASEEEEKEAKSD    |
| Human   | HMGN1 (1-100 a.a.) | hH           | 1- MPKRKVSSAEGAAKEEPKRR  |
|         |                    |              | 21- SARLSAKPPAKVEAKPKKAA |
|         |                    |              | 41- AKDKSSDKKVQTKGKRGAKG |
|         |                    |              | 61- KQAEVANQETKEDLPAENGE |
|         |                    |              | 81- TKTEESPASDEAGEKEAKSD |

**Table S2 | Antibodies for flow cytometry**

| Antibody       | Clone     | Antibody                | Clone    |
|----------------|-----------|-------------------------|----------|
| CD3e           | 145-2C11  | TIGIT                   | 1G9      |
| CD4            | RM4-4     | TIM-3                   | RMT3-23  |
| CD8a           | 53-6.7    | PD-1 / CD279            | RMP1-30  |
| CD11b          | M1/70     | Ly-6C                   | HK1.4    |
| CD11c          | N418      | Ly-6G                   | 1A8      |
| CD28           | 37.51     | CCR-7                   | 4B12     |
| CD44           | IM7       | IL-2                    | JES6-5H4 |
| CD45           | 30-F11    | IFN- $\gamma$           | XMG1.2   |
| B220           | RA3-6B2   | TNF- $\alpha$           | MP6-XT22 |
| CD49b / Pan NK | DX5       | <b>Isotype Controls</b> |          |
| CD90.1         | OX-7      | Mouse IgG               | MOPC-21  |
| CD137          | 17B5      | Rat IgG1                | HRPN     |
| ICOS / CD278   | C398.4A   | Rat IgG2b               | LTF-2    |
| LAG-3          | eBioC9B7W | American Hamster IgG    | HTK888   |

Monoclonal antibodies (mAbs) were purchased from BD bioscience, BioLegend, eBioscience or Tonbo bioscience.

**Table S3 | Primers for quantitative real-time PCR**

| Name                                                       | Sequences (5' – 3')         | Species      | Marker              |
|------------------------------------------------------------|-----------------------------|--------------|---------------------|
| Cytotoxic T-lymphocyte-associated protein 4 (Ctla4), F     | TCATGTACCCACCGCCATAC        | mus musculus | Eurofins (JP)       |
| Cytotoxic T-lymphocyte-associated protein 4 (Ctla4), R     | CCCCAAGCTAACTGCGACAA        | mus musculus | Eurofins (JP)       |
| Cytotoxic T-lymphocyte-associated protein 4 (Ctla4), Probe | TTGTGGGCATGGGCAACGGGACGCAGA | mus musculus | Eurofins (JP)       |
| Glyceraldehyde-3-phosphate dehydrogenase (Gapdh), F        | AGTATGACTCCACTCACGGCAA      | mus musculus | Sigma-Aldrich (USA) |
| Glyceraldehyde-3-phosphate dehydrogenase (Gapdh), R        | TCTCGCTCCTGGAAGATGGT        | mus musculus | Sigma-Aldrich (USA) |
| Lymphocyte-activation gene 3 (Lag3), F                     | CACCTGTAGCATCCATCTGC        | mus musculus | Eurofins (JP)       |
| Lymphocyte-activation gene 3 (Lag3), R                     | CCAGGTAACCCGAAGGATTT        | mus musculus | Eurofins (JP)       |
| Programmed cell death 1 (Pdc1), F                          | TGCAGTTGAGCTGGCAAT          | mus musculus | Eurofins (JP)       |
| Programmed cell death 1 (Pdc1), R                          | GGCTGGGTAGAAGGTGAGG         | mus musculus | Eurofins (JP)       |
| TIM-3 (Havcr2), F                                          | TTTTCAGGTCTTACCCTCAACTG     | mus musculus | Eurofins (JP)       |
| TIM-3 (Havcr2), R                                          | CATAAGCATTTCCAATGACCTT      | mus musculus | Eurofins (JP)       |

**Table S4 | Gene ontology (GO) analysis of GO: biological processes and KEGG pathway**

| ID         | GO term (upregulated)                                                     | Term <i>p</i> value | Nr. genes |
|------------|---------------------------------------------------------------------------|---------------------|-----------|
| KEGG:03010 | Ribosome                                                                  | 4.95E-44            | 36.00     |
| GO:0006412 | translation                                                               | 5.49E-25            | 37.00     |
| GO:0043043 | peptide biosynthetic process                                              | 1.64E-24            | 37.00     |
| GO:0043604 | amide biosynthetic process                                                | 6.51E-23            | 37.00     |
| GO:0006518 | peptide metabolic process                                                 | 9.93E-22            | 37.00     |
| GO:0043603 | cellular amide metabolic process                                          | 1.93E-19            | 37.00     |
| GO:1901566 | organonitrogen compound biosynthetic process                              | 1.44E-17            | 40.00     |
| GO:0000028 | ribosomal small subunit assembly                                          | 8.26E-10            | 6.00      |
| GO:0042274 | ribosomal small subunit biogenesis                                        | 1.47E-08            | 8.00      |
| GO:0042254 | ribosome biogenesis                                                       | 2.07E-08            | 13.00     |
| GO:0022613 | ribonucleoprotein complex biogenesis                                      | 6.30E-08            | 15.00     |
| GO:0042255 | ribosome assembly                                                         | 1.28E-07            | 7.00      |
| GO:2000341 | regulation of chemokine (C-X-C motif) ligand 2 production                 | 3.59E-07            | 4.00      |
| GO:0034341 | response to interferon-gamma                                              | 4.20E-07            | 8.00      |
| GO:0006123 | mitochondrial electron transport, cytochrome c to oxygen                  | 8.37E-07            | 4.00      |
| GO:0072567 | chemokine (C-X-C motif) ligand 2 production                               | 8.37E-07            | 4.00      |
| GO:0022618 | ribonucleoprotein complex assembly                                        | 8.53E-06            | 9.00      |
| GO:2000343 | positive regulation of chemokine (C-X-C motif) ligand 2 production        | 9.43E-06            | 3.00      |
| GO:0071826 | ribonucleoprotein complex subunit organization                            | 1.35E-05            | 9.00      |
| GO:0042775 | mitochondrial ATP synthesis coupled electron transport                    | 2.27E-05            | 5.00      |
| GO:0006364 | rRNA processing                                                           | 3.05E-05            | 8.00      |
| GO:0042773 | ATP synthesis coupled electron transport                                  | 3.27E-05            | 5.00      |
| GO:0046596 | regulation of viral entry into host cell                                  | 3.68E-05            | 4.00      |
| GO:1902253 | regulation of intrinsic apoptotic signaling pathway by p53 class mediator | 4.23E-05            | 4.00      |
| KEGG:05016 | Huntington's disease                                                      | 4.28E-05            | 8.00      |
| KEGG:04932 | Non-alcoholic fatty liver disease (NAFLD)                                 | 6.25E-05            | 7.00      |
| GO:0032642 | regulation of chemokine production                                        | 1.03E-04            | 5.00      |
| GO:0022904 | respiratory electron transport chain                                      | 1.43E-04            | 5.00      |
| GO:0032602 | chemokine production                                                      | 1.43E-04            | 5.00      |
| GO:0034643 | establishment of mitochondrion localization, microtubule-mediated         | 1.45E-04            | 3.00      |
| GO:0047497 | mitochondrion transport along microtubule                                 | 1.45E-04            | 3.00      |
| GO:0006119 | oxidative phosphorylation                                                 | 1.82E-04            | 5.00      |
| GO:0046597 | negative regulation of viral entry into host cell                         | 2.09E-04            | 3.00      |
| GO:0045624 | positive regulation of T-helper cell differentiation                      | 2.09E-04            | 3.00      |
| GO:0045071 | negative regulation of viral genome replication                           | 2.13E-04            | 4.00      |
| GO:0022900 | electron transport chain                                                  | 2.28E-04            | 5.00      |
| GO:0051654 | establishment of mitochondrion localization                               | 2.46E-04            | 3.00      |

|            |                                                               |          |      |
|------------|---------------------------------------------------------------|----------|------|
| GO:0002699 | positive regulation of immune effector process                | 2.52E-04 | 7.00 |
| KEGG:00190 | Oxidative phosphorylation                                     | 2.56E-04 | 6.00 |
| GO:0072332 | intrinsic apoptotic signaling pathway by p53 class mediator   | 2.69E-04 | 5.00 |
| GO:0035456 | response to interferon-beta                                   | 2.74E-04 | 4.00 |
| GO:0030490 | maturation of SSU-rRNA                                        | 3.46E-04 | 4.00 |
| GO:0032722 | positive regulation of chemokine production                   | 3.46E-04 | 4.00 |
| GO:0035455 | response to interferon-alpha                                  | 3.86E-04 | 3.00 |
| GO:0002293 | alpha-beta T cell differentiation involved in immune response | 4.02E-04 | 4.00 |
| GO:0022408 | negative regulation of cell-cell adhesion                     | 4.05E-04 | 6.00 |
| GO:0046632 | alpha-beta T cell differentiation                             | 4.25E-04 | 5.00 |
| GO:0002287 | alpha-beta T cell activation involved in immune response      | 4.32E-04 | 4.00 |
| GO:0002286 | T cell activation involved in immune response                 | 5.12E-04 | 5.00 |

| ID         | GO term (downregulated)                                                 | Term <i>p</i> value | Nr. genes |
|------------|-------------------------------------------------------------------------|---------------------|-----------|
| GO:0006996 | organelle organization                                                  | 4.71E-18            | 124.00    |
| GO:1903047 | mitotic cell cycle process                                              | 1.67E-14            | 45.00     |
| GO:0051276 | chromosome organization                                                 | 6.70E-14            | 55.00     |
| GO:0022402 | cell cycle process                                                      | 1.02E-13            | 55.00     |
| GO:0007049 | cell cycle                                                              | 1.77E-13            | 66.00     |
| GO:0000280 | nuclear division                                                        | 1.13E-12            | 38.00     |
| GO:0051301 | cell division                                                           | 1.14E-12            | 37.00     |
| GO:0000278 | mitotic cell cycle                                                      | 1.35E-12            | 45.00     |
| GO:0007067 | mitotic nuclear division                                                | 3.09E-12            | 32.00     |
| GO:0048285 | organelle fission                                                       | 1.00E-11            | 38.00     |
| GO:0006259 | DNA metabolic process                                                   | 4.23E-11            | 44.00     |
| GO:0051052 | regulation of DNA metabolic process                                     | 9.86E-10            | 26.00     |
| GO:0007059 | chromosome segregation                                                  | 5.82E-09            | 22.00     |
| KEGG:04110 | Cell cycle                                                              | 1.79E-08            | 14.00     |
| GO:0051172 | negative regulation of nitrogen compound metabolic process              | 2.21E-08            | 57.00     |
| GO:0045934 | negative regulation of nucleobase-containing compound metabolic process | 3.61E-08            | 53.00     |
| GO:0000723 | telomere maintenance                                                    | 6.36E-08            | 13.00     |
| GO:0032200 | telomere organization                                                   | 7.05E-08            | 13.00     |
| GO:0006261 | DNA-dependent DNA replication                                           | 7.81E-08            | 13.00     |
| GO:0007051 | spindle organization                                                    | 1.11E-07            | 14.00     |
| GO:0006260 | DNA replication                                                         | 1.38E-07            | 18.00     |
| GO:0010558 | negative regulation of macromolecule biosynthetic process               | 1.64E-07            | 52.00     |
| GO:2000113 | negative regulation of cellular macromolecule biosynthetic process      | 1.69E-07            | 50.00     |
| GO:0010605 | negative regulation of macromolecule metabolic process                  | 1.99E-07            | 74.00     |
| GO:0009890 | negative regulation of biosynthetic process                             | 2.11E-07            | 54.00     |
| GO:0006281 | DNA repair                                                              | 2.41E-07            | 24.00     |

|            |                                                                         |          |       |
|------------|-------------------------------------------------------------------------|----------|-------|
| GO:0000070 | mitotic sister chromatid segregation                                    | 2.46E-07 | 13.00 |
| GO:0031327 | negative regulation of cellular biosynthetic process                    | 3.07E-07 | 53.00 |
| GO:0031324 | negative regulation of cellular metabolic process                       | 3.13E-07 | 74.00 |
| GO:0000226 | microtubule cytoskeleton organization                                   | 4.19E-07 | 25.00 |
| GO:0060249 | anatomical structure homeostasis                                        | 4.33E-07 | 21.00 |
| GO:0000819 | sister chromatid segregation                                            | 4.45E-07 | 14.00 |
| GO:0098813 | nuclear chromosome segregation                                          | 4.87E-07 | 17.00 |
| GO:0033044 | regulation of chromosome organization                                   | 6.25E-07 | 19.00 |
| GO:0033554 | cellular response to stress                                             | 6.92E-07 | 54.00 |
| GO:0071103 | DNA conformation change                                                 | 1.81E-06 | 15.00 |
| GO:0051726 | regulation of cell cycle                                                | 1.89E-06 | 35.00 |
| GO:0071897 | DNA biosynthetic process                                                | 2.64E-06 | 13.00 |
| GO:0006302 | double-strand break repair                                              | 2.71E-06 | 14.00 |
| GO:0051054 | positive regulation of DNA metabolic process                            | 2.90E-06 | 15.00 |
| GO:0051173 | positive regulation of nitrogen compound metabolic process              | 3.11E-06 | 57.00 |
| GO:0032210 | regulation of telomere maintenance via telomerase                       | 6.02E-06 | 7.00  |
| GO:0051649 | establishment of localization in cell                                   | 7.68E-06 | 54.00 |
| GO:0044772 | mitotic cell cycle phase transition                                     | 9.60E-06 | 18.00 |
| GO:0046907 | intracellular transport                                                 | 1.08E-05 | 46.00 |
| GO:0006974 | cellular response to DNA damage stimulus                                | 1.11E-05 | 28.00 |
| GO:1902850 | microtubule cytoskeleton organization involved in mitosis               | 1.34E-05 | 9.00  |
| GO:0007052 | mitotic spindle organization                                            | 1.34E-05 | 9.00  |
| GO:0010564 | regulation of cell cycle process                                        | 1.37E-05 | 23.00 |
| GO:0051253 | negative regulation of RNA metabolic process                            | 1.39E-05 | 43.00 |
| GO:0007346 | regulation of mitotic cell cycle                                        | 1.49E-05 | 21.00 |
| GO:0007010 | cytoskeleton organization                                               | 1.53E-05 | 40.00 |
| GO:1902679 | negative regulation of RNA biosynthetic process                         | 1.61E-05 | 42.00 |
| GO:0010833 | telomere maintenance via telomere lengthening                           | 1.75E-05 | 8.00  |
| GO:0034502 | protein localization to chromosome                                      | 1.95E-05 | 8.00  |
| GO:0007004 | telomere maintenance via telomerase                                     | 2.20E-05 | 7.00  |
| GO:0033043 | regulation of organelle organization                                    | 2.28E-05 | 39.00 |
| GO:1903507 | negative regulation of nucleic acid-templated transcription             | 2.46E-05 | 41.00 |
| GO:0090307 | mitotic spindle assembly                                                | 2.50E-05 | 7.00  |
| GO:1904356 | regulation of telomere maintenance via telomere lengthening             | 2.50E-05 | 7.00  |
| GO:0032204 | regulation of telomere maintenance                                      | 2.66E-05 | 8.00  |
| GO:0045935 | positive regulation of nucleobase-containing compound metabolic process | 2.72E-05 | 52.00 |
| GO:0044770 | cell cycle phase transition                                             | 2.76E-05 | 18.00 |
| GO:0045892 | negative regulation of transcription, DNA-templated                     | 3.29E-05 | 40.00 |

---
